# Supplementary material for: Impact of Commercial Strain Use on Saccharomyces cerevisiae Population Structure and Dynamics in Pinot Noir Vineyards and Spontaneous Fermentations of a Canadian Winery
Source: PLoS One. 2016 Aug 23;11(8):e0160259. doi: 10.1371/journal.pone.0160259 (PMC4995015; doi:10.1371/journal.pone.0160259)
Supplement: S1 Table — (XLSX) [file pone.0160259.s003.xlsx]

## Sheet: S1 Table
S1 Table. Multi-Locus genotypes identified from 1927 SBV isolates, 2013-2014
MLG name	Matching/related commercial strain	MLG class	YGL139W		YFR028C		YGL014W		YOL109W		YML091C		YLL049W		YDR160W		YPL009C
AnVIN13	Anchor VIN 13	C	115	115	122	124	139	146	253	310	268	307	289	293	388	400	423	425
LalBA11	Lalvin BA11®	C	121	121	137	137	155	155	265	265	283	283	291	291	397	397	414	414
LalD254	Lalvin ICV D254®	C	121	121	122	122	149	149	256	256	274	274	275	275	380	380	449	449
LalDV10	Lalvin DV10™	C	115	115	124	132	146	146	310	310	268	316	289	276	388	483	423	434
LalGRE	Lalvin ICV GRE®	C	136	136	180	180	146	146	256	256	274	274	291	291	403	403	455	455
LalRA17	Lalvin RA17®	C	115	121	122	137	146	146	265	268	274	280	293	293	400	397	446	452
LalRC212	Lalvin RC212®	C	121	121	120	120	146	149	256	261	316	316	275	275	380	380	449	452
LalRho2056	Lalvin Rhone 2056®	C	121	124	122	161	146	149	265	249	274	322	291	276	400	400	452	393
SB522Davis.20	522 Davis (Montrachet)	CR	115	121	120	159	139	153	253	253	271	271	291	291	385	385	446	446
SBAnVIN13.10	Anchor VIN 13	CR	115	115	122	124	139	146	253	253	268	307	289	293	388	400	423	425
SBAnVIN13.20	Anchor VIN 13	CR	115	115	122	124	139	146	253	253	268	268	289	293	388	400	423	425
SBEC1118.20	Lalvin EC1118™	CR	115	121	124	132	139	146	310	265	316	316	289	276	388	388	423	434
SBEC1118.40	Lalvin EC1118™	CR	115	115	124	124	139	146	310	310	268	268	289	276	483	483	423	434
SBVIN7.20	Anchor VIN7®	CR	115	115	168	184	139	153	249	249	268	271	291	276	388	422	434	434
SBLalBRL97.40	Lalvin BRL97™	CR	121	121	122	122	143	143	249	249	283	298	287	287	385	385	446	446
SBLalBRL97.50	Lalvin BRL97™	CR	121	121	120	120	143	143	246	246	301	301	287	277	385	385	446	420
SBLalD254.10	Lalvin ICV D254®	CR	121	121	122	122	149	149	256	256	274	274	275	275	380	380	449	420
SBLalD254.20	Lalvin ICV D254®	CR	121	121	122	122	153	153	256	256	274	274	275	275	380	380	449	449
SBLalD80.10	Lalvin ICV D80®	CR	121	118	184	139	146	146	253	270	244	244	275	295	400	441	437	437
SBLalD80.20	Lalvin ICV D80®	CR	121	118	184	139	146	155	253	270	244	244	275	295	400	441	437	437
SBLalD80.21	Lalvin ICV D80®	CR	118	118	184	139	146	146	253	270	244	244	275	295	400	441	437	437
SBLalD80.40	Lalvin ICV D80®	CR	121	118	184	139	146	155	253	270	244	244	275	275	400	441	437	437
SBLalDV10.10	Lalvin ICV D80®	CR	115	115	124	132	146	146	310	310	268	316	289	276	483	483	423	434
SBLalDV10.11	Lalvin DV10™	CR	115	115	132	132	146	146	310	310	268	316	289	276	388	483	423	434
SBLalDV10.12	Lalvin DV10™	CR	115	115	124	132	146	146	310	310	268	316	289	276	388	388	423	434
SBLalDV10.30	Lalvin DV10™	CR	115	115	124	132	139	146	310	310	268	268	289	276	388	388	423	434
SBLalGRE.10	Lalvin ICV GRE®	CR	136	136	180	180	146	146	256	256	274	274	291	291	403	403	455	420
SBLalGRE.20	Lalvin ICV GRE®	CR	136	136	180	180	146	146	256	256	274	274	291	277	403	403	455	420
SBLalGRE.23	Lalvin ICV GRE®	CR	136	136	182	182	146	146	256	256	274	274	291	291	403	403	455	455
SBLalGRE.30	Lalvin ICV GRE®	CR	136	136	180	120	146	146	256	256	274	274	291	277	403	403	455	420
SBLalGRE.40	Lalvin ICV GRE®	CR	136	136	120	182	146	146	256	256	274	274	291	277	403	403	455	420
SBLalRA17.10	Lalvin RA17®	CR	115	121	122	137	146	146	268	268	274	280	293	293	400	397	446	452
SBLalRA17.11	Lalvin RA17®	CR	115	115	122	137	146	146	265	268	274	280	293	293	400	397	446	452
SBLalRA17.12	Lalvin RA17®	CR	115	121	122	137	146	146	265	268	274	280	293	295	400	397	446	452
SBLalRA17.20	Lalvin RA17®	CR	115	115	122	137	146	146	268	268	274	280	293	293	400	397	446	452
SBLalRC212.10	Lalvin RC212®	CR	121	121	120	120	146	146	256	261	316	316	275	275	380	380	449	452
SBLalRC212.11	Lalvin RC212®	CR	121	121	120	120	146	149	256	256	316	316	275	275	380	380	449	452
SBLalRC212.12	Lalvin RC212®	CR	121	121	120	120	146	146	261	261	316	316	275	275	380	380	449	449
SBLalRC212.13	Lalvin RC212®	CR	121	121	120	120	146	149	256	261	316	295	275	275	380	380	449	452
SBLalRC212.16	Lalvin RC212®	CR	121	121	120	120	146	149	256	261	316	335	275	275	380	380	449	452
SBLalRC212.17	Lalvin RC212®	CR	121	121	120	120	146	149	261	261	316	316	275	275	380	380	449	452
SBLalRC212.30	Lalvin RC212®	CR	121	121	120	120	149	149	256	256	316	316	275	275	380	380	452	452
SBLalRC212.31	Lalvin RC212®	CR	121	121	120	120	149	149	261	261	316	316	275	275	380	380	452	452
SBLalRC212.32	Lalvin RC212®	CR	121	121	120	120	149	149	261	261	316	316	275	275	380	380	449	449
SBLalRC212.33	Lalvin RC212®	CR	121	121	120	120	146	146	256	256	316	316	275	275	380	380	452	452
SBLalRho2226.10	Lalvin Rhone 2056®	CR	115	121	163	174	153	143	268	249	271	253	289	291	403	385	449	446
SBLalRho2226.11	Lalvin Rhone 2056®	CR	121	121	161	174	153	143	268	249	271	253	289	291	403	385	449	446
SBUvaSVG.10	Uvaferm SVG™	CR	136	136	141	141	146	146	256	256	244	244	295	295	403	403	446	420
SBUvaSVG.11	Uvaferm SVG™	CR	136	136	141	141	146	146	256	256	244	244	295	295	403	403	446	452
SBUvaSVG.21	Uvaferm SVG™	CR	136	136	141	141	146	146	256	256	244	244	295	279	403	403	446	420
SBUvaSVG.22	Uvaferm SVG™	CR	136	136	141	141	146	146	256	256	244	244	277	295	403	403	446	420
SBV001	N/A	U	124	124	159	159	130	130	253	253	254	254	277	277	380	380	393	393
SBV002	N/A	U	121	121	170	170	146	146	253	253	259	259	291	291	406	406	452	452
SBV003	N/A	U	121	121	120	120	149	149	253	278	254	254	277	277	397	397	420	420
SBV004	N/A	U	121	121	151	151	146	149	256	261	316	316	289	301	388	406	423	423
SBV006	N/A	U	115	115	124	124	139	146	310	316	268	271	289	276	483	382	423	423
SBV007	N/A	U	121	121	168	168	146	146	253	253	259	259	291	291	406	406	452	452
SBV008	N/A	U	121	121	168	170	146	146	253	253	259	259	291	291	406	406	452	452
SBV009	N/A	U	121	109	120	151	146	133	256	260	316	259	289	293	388	382	425	452
SBV011	N/A	U	124	124	170	170	133	133	253	253	254	254	277	277	400	400	420	420
SBV014	N/A	U	109	109	120	120	133	133	263	263	254	254	279	279	496	496	420	420
SBV015	N/A	U	124	124	159	159	133	133	266	266	254	254	277	277	400	400	420	420
SBV016	N/A	U	124	124	120	120	149	149	263	263	254	254	277	277	496	496	420	420
SBV017	N/A	U	121	121	159	139	146	146	261	261	280	280	289	289	400	400	446	452
SBV018	N/A	U	109	109	120	120	130	130	297	297	254	254	275	275	397	397	399	399
SBV021	N/A	U	121	121	120	120	149	149	253	253	254	254	277	277	403	403	420	420
SBV022	N/A	U	124	124	170	170	133	133	278	234	254	254	277	277	400	400	420	420
SBV024	N/A	U	124	124	161	163	133	133	266	266	254	254	277	277	400	400	420	420
SBV027	N/A	U	121	121	168	168	146	149	253	253	259	259	291	291	406	406	452	452
SBV030	N/A	U	124	124	151	151	146	146	260	260	259	259	293	293	382	382	452	452
SBV031	N/A	U	124	124	170	170	136	136	253	253	254	254	277	277	380	380	393	393
SBV032	N/A	U	124	124	170	170	133	133	278	278	254	254	277	277	400	400	420	420
SBV033	N/A	U	124	124	161	161	133	133	266	266	254	254	277	277	400	400	420	420
SBV034	N/A	U	124	124	120	120	149	149	278	278	254	254	277	277	397	397	420	420
SBV035	N/A	U	124	124	120	120	149	149	278	234	254	254	277	277	397	397	420	420
SBV037	N/A	U	124	124	166	166	130	130	266	266	254	254	277	277	400	400	420	420
SBV038	N/A	U	121	121	120	120	149	149	256	256	254	254	277	277	403	403	420	420
SBV039	N/A	U	121	121	155	155	149	149	265	265	236	236	293	293	385	385	423	423
SBV040	N/A	U	124	124	120	120	149	149	260	260	254	254	277	277	397	397	420	420
SBV041	N/A	U	121	121	139	139	149	149	263	263	254	254	277	277	400	400	420	420
SBV042	N/A	U	121	121	139	139	146	146	261	261	259	259	293	293	388	388	452	452
SBV043	N/A	U	124	124	159	159	133	133	253	253	254	254	277	277	380	380	393	393
SBV044	N/A	U	124	124	120	161	133	133	266	266	254	254	277	277	400	400	420	420
SBV045	N/A	U	121	121	120	120	133	133	253	253	254	254	279	279	380	380	452	452
SBV047	N/A	U	124	124	170	153	133	133	278	234	254	254	277	277	400	400	420	420
SBV048	N/A	U	121	121	120	120	149	149	253	253	254	254	277	277	397	403	420	420
SBV049	N/A	U	121	121	159	159	133	133	266	266	254	254	277	277	400	400	420	420
SBV050	N/A	U	109	109	120	120	133	133	260	260	254	254	279	279	397	397	399	399
SBV051	N/A	U	124	124	157	157	146	146	263	263	254	254	277	277	496	496	420	420
SBV052	N/A	U	124	124	172	172	133	133	263	263	254	254	277	277	400	400	420	420
SBV053	N/A	U	124	124	139	139	149	149	266	266	254	254	277	277	400	400	420	420
SBV054	N/A	U	109	109	120	170	133	133	278	263	254	254	277	279	400	400	420	420
SBV055	N/A	U	124	124	120	120	133	133	266	266	254	254	277	277	400	400	420	420
SBV057	N/A	U	109	109	174	174	133	133	263	263	254	254	277	277	496	496	399	399
SBV058	N/A	U	124	124	120	120	133	133	263	263	254	254	277	277	496	496	420	420
SBV059	N/A	U	124	109	120	170	133	133	278	263	254	254	277	279	400	400	420	420
SBV060	N/A	U	121	121	159	159	133	133	266	266	254	254	277	277	400	403	420	420
SBV061	N/A	U	121	121	159	159	149	149	266	266	254	254	277	277	400	400	420	420
SBV062	N/A	U	121	121	151	151	149	149	261	261	316	316	289	289	406	406	423	423
SBV063	N/A	U	124	124	120	120	133	133	278	278	254	254	277	277	400	400	420	420
SBV065	N/A	U	121	124	122	159	139	133	261	266	298	254	277	281	400	403	446	420
SBV066	N/A	U	124	124	120	120	149	149	278	278	254	254	277	277	496	496	420	420
SBV068	N/A	U	136	109	120	120	146	133	256	260	274	254	291	279	397	403	399	399
SBV069	N/A	U	124	124	120	120	149	149	290	290	254	254	277	277	496	496	420	420
SBV072	N/A	U	121	121	155	155	146	149	265	265	236	236	293	293	385	385	423	423
SBV073	N/A	U	124	124	170	170	133	133	253	253	254	254	277	277	380	380	420	420
SBV074	N/A	U	127	127	148	148	149	149	258	258	254	254	277	277	496	496	452	452
SBV075	N/A	U	121	121	120	120	149	149	256	256	316	316	295	295	400	400	449	449
SBV078	N/A	U	136	136	120	182	146	146	256	256	274	274	291	277	403	403	420	420
SBV083	N/A	U	124	124	159	159	130	130	253	253	254	254	277	277	380	380	393	420
SBV087	N/A	U	124	124	120	120	133	133	263	263	254	254	275	275	400	400	420	420
SBV088	N/A	U	121	121	151	151	149	149	261	261	316	316	289	277	406	406	425	425
SBV089	N/A	U	124	109	120	120	133	133	263	263	254	254	277	279	496	496	420	420
SBV090	N/A	U	124	124	137	137	146	146	249	249	295	254	293	277	400	400	393	420
SBV092	N/A	U	124	124	120	159	149	149	263	263	254	254	277	277	400	400	420	420
SBV093	N/A	U	121	121	120	170	146	146	253	253	259	259	291	277	406	406	452	420
SBV094	N/A	U	124	109	120	120	133	133	260	260	254	254	279	279	397	397	399	399
SBV098	N/A	U	136	124	182	182	146	146	256	256	274	274	291	277	403	403	420	420
SBV102	N/A	U	146	146	180	180	146	146	256	256	274	274	291	277	403	403	420	420
SBV103	N/A	U	124	124	139	139	133	133	266	266	254	254	277	277	400	400	420	420
SBV104	N/A	U	121	121	168	168	146	146	253	253	259	259	291	277	406	406	452	452
SBV105	N/A	U	121	124	120	120	133	133	253	253	254	254	277	277	397	380	452	420
SBV107	N/A	U	124	109	120	120	133	133	263	263	254	254	277	277	496	496	420	420
SBV111	N/A	U	124	124	120	139	146	155	266	266	254	254	277	277	400	400	420	420
SBV112	N/A	U	124	124	120	157	146	146	263	263	254	254	277	277	496	496	420	420
SBV114	N/A	U	124	124	120	170	133	133	253	253	254	254	277	277	380	380	393	420
SBV115	N/A	U	124	124	120	170	133	133	253	253	254	254	277	277	380	380	420	420
SBV116	N/A	U	124	124	120	170	133	133	278	278	254	254	277	277	400	400	420	420
SBV117	N/A	U	124	124	120	159	133	133	266	266	254	254	277	277	400	400	420	420
SBV120	N/A	U	121	121	122	139	146	149	256	261	274	259	293	275	388	380	449	452
SBV122	N/A	U	124	124	170	170	130	130	266	266	254	254	277	277	400	400	420	420
SBV123	N/A	U	121	121	155	155	149	149	265	265	236	236	293	277	385	385	423	423
SBV126	N/A	U	121	121	139	139	146	146	261	261	259	259	293	277	388	388	452	452
SBV128	N/A	U	124	124	159	139	146	146	261	261	280	320	289	277	400	400	446	452
SBV129	N/A	U	124	124	120	153	133	133	278	278	254	254	277	277	400	400	420	420
SBV131	N/A	U	124	124	120	120	149	149	278	278	254	254	277	277	397	397	449	420
SBV133	N/A	U	121	121	120	120	149	149	253	278	254	254	277	277	403	403	420	420
SBV136	N/A	U	121	121	120	168	146	149	253	253	259	259	291	291	406	406	452	452
SBV137	N/A	U	121	121	120	120	149	149	278	278	254	254	277	277	403	403	420	420
SBV139	N/A	U	121	121	157	157	149	149	253	253	247	247	299	299	400	400	452	452
SBV140	N/A	U	121	121	151	151	146	149	256	261	316	313	289	289	388	406	423	425
SBV142	N/A	U	121	121	151	151	149	149	256	256	313	313	301	301	406	406	423	423
SBV146	N/A	U	109	109	120	120	133	133	260	260	254	254	277	277	380	380	399	399
SBV147	N/A	U	124	124	120	120	133	133	263	263	254	254	279	279	380	380	452	452
SBV148	N/A	U	124	124	170	170	133	133	278	278	254	254	277	277	400	373	420	420
SBV150	N/A	U	124	124	120	120	133	133	260	260	254	254	279	279	380	380	420	420
SBV151	N/A	U	121	121	161	161	153	153	253	253	254	254	277	277	400	400	420	420
SBV154	N/A	U	109	109	120	120	133	133	260	260	254	254	279	279	397	397	408	408
SBV155	N/A	U	115	121	124	135	149	143	294	294	268	271	276	276	388	385	449	452
SBV160	N/A	U	115	121	124	135	149	143	294	294	268	271	276	276	388	385	452	452
SBV161	N/A	U	121	121	139	139	149	149	258	258	316	316	301	301	400	400	449	449
SBV162	N/A	U	124	124	168	166	146	146	265	265	301	304	299	299	403	403	446	420
SBV163	N/A	U	115	121	124	124	149	143	294	294	268	271	276	276	388	385	449	452
SBV164	N/A	U	124	124	124	135	133	133	263	263	254	254	279	279	380	380	452	452
SBV165	N/A	U	124	124	159	159	133	133	266	266	254	257	277	277	400	400	420	420
SBV170	N/A	U	121	127	122	139	149	143	249	249	271	244	293	293	403	403	449	446
SBV171	N/A	U	121	124	137	159	146	130	253	261	298	254	293	277	380	403	446	393
SBV173	N/A	U	109	109	120	120	133	133	278	278	254	254	279	279	496	496	399	399
SBV174	N/A	U	121	121	174	174	143	143	265	265	298	298	287	287	385	385	446	446
SBV176	N/A	U	121	121	122	139	149	143	249	249	271	271	293	293	403	373	449	446
SBV178	N/A	U	124	124	159	159	133	133	253	253	254	254	277	277	400	400	393	393
SBV179	N/A	U	121	121	153	148	146	146	256	249	280	280	293	299	403	403	455	446
SBV180	N/A	U	124	124	166	166	146	146	265	265	301	304	299	299	403	403	446	420
SBV182	N/A	U	124	124	120	120	133	133	263	263	254	254	279	279	380	380	420	420
SBV183	N/A	U	121	121	139	139	149	158	249	249	247	247	303	303	388	388	423	423
SBV184	N/A	U	109	109	120	120	133	133	300	300	254	254	279	279	397	397	399	399
SBV185	N/A	U	124	124	176	176	133	133	278	278	259	259	293	293	373	373	393	393
SBV187	N/A	U	109	109	120	120	133	133	263	263	322	254	279	279	496	496	420	375
SBV188	N/A	U	109	109	120	120	130	130	300	300	254	254	275	275	397	397	399	399
SBV189	N/A	U	124	124	174	174	133	133	278	278	254	254	277	277	403	403	420	420
SBV190	N/A	U	121	124	120	139	149	149	263	263	254	259	277	277	400	496	420	420
SBV191	N/A	U	124	124	120	120	149	149	278	278	254	254	277	277	397	496	420	420
SBV192	N/A	U	121	124	120	139	149	149	263	263	254	259	277	277	400	400	420	420
SBV193	N/A	U	109	109	120	120	133	133	263	263	254	254	279	279	400	496	420	420
SBV194	N/A	U	124	124	159	159	133	133	278	278	254	254	279	279	397	397	420	420
SBV196	N/A	U	121	124	120	139	149	130	263	263	254	259	277	277	400	397	420	399
SBV199	N/A	U	121	121	139	139	146	146	261	261	259	259	295	295	388	388	452	452
SBV200	N/A	U	118	118	122	184	146	146	270	270	244	244	275	275	400	400	437	437
SBV201	N/A	U	124	124	120	120	146	146	260	260	259	259	293	293	496	496	452	452
SBV204	N/A	U	121	124	166	148	146	146	249	231	280	301	299	303	406	406	446	452
SBV205	N/A	U	127	127	128	128	146	146	249	249	286	286	291	291	400	400	446	446
SBV207	N/A	U	124	124	159	159	133	133	266	266	254	254	277	277	400	403	420	420
SBV209	N/A	U	121	121	151	151	146	146	261	261	316	316	301	301	406	406	425	425
SBV211	N/A	U	121	124	166	166	146	146	249	231	280	301	303	303	406	406	446	452
SBV214	N/A	U	124	124	174	174	133	133	278	278	254	254	277	277	400	400	420	420
SBV215	N/A	U	124	124	122	176	133	133	278	278	259	259	293	293	373	373	393	393
SBV216	N/A	U	109	109	120	120	133	133	263	263	254	254	279	279	403	496	420	420
SBV217	N/A	U	121	124	120	168	146	146	253	253	259	259	291	277	406	406	452	420
SBV218	N/A	U	124	109	120	174	133	133	278	263	254	254	277	277	403	403	420	420
SBV219	N/A	U	124	109	120	120	130	133	278	278	254	254	277	277	397	397	420	399
SBVRHST.30	Lalvin R-HST®	CR	127	127	137	159	155	155	253	253	298	253	293	291	409	409	446	446
SBZfVL1.3z	Zymaflore® VL1	CR	115	115	122	137	139	153	261	261	283	283	297	297	403	403	449	446
SBZfVL2.10	Zymaflore® VL2	CR	115	115	122	153	153	153	253	258	298	326	293	297	400	403	446	416
SBZfVL2.11	Zymaflore® VL2	CR	115	124	122	122	153	153	253	258	298	326	293	297	400	403	446	416
SBZfVL2.12	Zymaflore® VL2	CR	115	124	122	153	153	153	253	258	298	326	293	297	403	403	446	416
SBZfVL2.13	Zymaflore® VL2	CR	115	124	122	153	153	153	253	258	298	298	293	297	400	403	446	416
SBZfVL2.14	Zymaflore® VL2	CR	115	124	122	153	153	153	253	258	298	326	277	297	400	403	446	416
SBZfVL2.15	Zymaflore® VL2	CR	115	124	122	153	153	153	253	258	298	326	293	293	400	403	446	416
SBZfVL2.16	Zymaflore® VL2	CR	115	124	122	153	153	153	253	258	298	326	297	297	400	403	446	416
SBZfVL2.17	Zymaflore® VL2	CR	115	124	122	153	153	153	253	258	326	326	293	297	400	403	446	416
SBZfVL2.18	Zymaflore® VL2	CR	115	124	122	155	153	153	253	258	298	326	293	297	400	403	446	416
SBZfVL2.19	Zymaflore® VL2	CR	124	124	122	153	153	153	253	258	298	326	293	297	400	403	446	416
SBZfVL2.20	Zymaflore® VL2	CR	115	115	122	153	153	153	258	258	298	326	293	297	400	403	446	416
SBZfVL2.21	Zymaflore® VL2	CR	115	124	122	153	153	153	253	258	326	326	293	297	403	403	446	416
SBZfVL2.22	Zymaflore® VL2	CR	115	124	122	153	153	153	253	258	326	239	293	297	400	400	446	416
SBZfVL2.30	Zymaflore® VL2	CR	115	124	122	153	153	153	253	258	295	295	297	297	400	403	446	416
SBZfVL3.10	Zymaflore® VL3	CR	115	121	122	137	139	146	253	261	298	295	293	281	403	403	449	446
SBZfVL3.100	Zymaflore® VL3	CR	115	121	122	137	139	146	253	253	298	295	293	281	403	385	449	446
SBZfVL3.101	Zymaflore® VL3	CR	115	121	122	137	139	146	253	261	298	236	293	281	403	385	449	446
SBZfVL3.102	Zymaflore® VL3	CR	115	121	122	137	139	146	253	261	295	295	293	281	403	385	449	446
SBZfVL3.103	Zymaflore® VL3	CR	115	121	122	137	139	146	253	261	298	295	295	281	403	385	449	446
SBZfVL3.104	Zymaflore® VL3	CR	115	121	122	137	139	146	253	261	298	295	293	293	403	385	449	446
SBZfVL3.106	Zymaflore® VL3	CR	115	121	122	137	139	146	253	261	301	295	293	281	403	385	449	446
SBZfVL3.107	Zymaflore® VL3	CR	115	121	122	137	139	146	253	261	298	298	293	281	403	385	449	446
SBZfVL3.108	Zymaflore® VL3	CR	115	121	122	137	139	146	253	265	298	295	293	281	403	385	449	446
SBZfVL3.109	Zymaflore® VL3	CR	115	121	122	137	139	146	261	261	298	295	293	281	403	385	449	446
SBZfVL3.110	Zymaflore® VL3	CR	115	121	122	137	139	149	253	261	298	295	293	281	403	385	449	446
SBZfVL3.111	Zymaflore® VL3	CR	115	121	122	137	146	146	253	261	298	295	293	281	403	385	449	446
SBZfVL3.112	Zymaflore® VL3	CR	121	121	122	137	139	146	253	261	298	295	293	281	403	385	449	446
SBZfVL3.13	Zymaflore® VL3	CR	115	121	122	137	139	146	253	261	298	247	293	281	403	385	449	446
SBZfVL3.16	Zymaflore® VL3	CR	115	121	122	137	139	146	253	261	298	295	281	281	403	385	449	446
SBZfVL3.17	Zymaflore® VL3	CR	115	121	122	137	139	146	253	261	298	295	293	281	385	385	449	446
SBZfVL3.18	Zymaflore® VL3	CR	115	115	122	137	139	146	253	261	298	295	293	281	403	385	449	446
SBZfVL3.19	Zymaflore® VL3	CR	115	121	122	122	139	146	253	261	298	295	293	281	403	385	449	446
SBZfVL3.20	Zymaflore® VL3	CR	115	115	122	137	139	146	253	261	298	295	281	281	403	385	449	446
SBZfVL3.200	Zymaflore® VL3	CR	115	121	122	137	139	146	253	261	298	295	293	293	403	403	449	446
SBZfVL3.201	Zymaflore® VL3	CR	115	121	122	137	139	146	253	261	298	298	281	281	403	385	449	446
SBZfVL3.202	Zymaflore® VL3	CR	115	121	122	137	139	146	253	261	298	298	293	281	403	403	449	446
SBZfVL3.203	Zymaflore® VL3	CR	115	121	122	137	139	146	261	261	298	295	281	281	403	385	449	446
SBZfVL3.204	Zymaflore® VL3	CR	115	121	122	137	139	149	253	261	295	295	293	281	403	385	449	446
SBZfVL3.206	Zymaflore® VL3	CR	121	121	122	137	139	139	253	261	298	295	293	281	403	385	449	446
SBZfVL3.207	Zymaflore® VL3	CR	121	121	122	137	139	146	253	261	298	295	293	293	403	385	449	446
SBZfVL3.208	Zymaflore® VL3	CR	121	121	122	137	146	146	253	261	298	295	293	281	403	385	449	446
SBZfVL3.21	Zymaflore® VL3	CR	115	121	137	120	139	146	253	261	298	295	281	281	403	385	449	446
SBZfVL3.22	Zymaflore® VL3	CR	115	121	122	122	139	146	253	261	298	295	281	281	403	385	449	446
SBZfVL3.23	Zymaflore® VL3	CR	115	121	122	137	139	146	253	261	298	243	293	281	403	403	449	446
SBZfVL3.25	Zymaflore® VL3	CR	115	121	122	137	139	146	253	261	298	295	281	281	385	385	449	446
SBZfVL3.26	Zymaflore® VL3	CR	115	121	122	137	139	146	253	261	298	295	281	281	403	385	449	449
SBZfVL3.27	Zymaflore® VL3	CR	115	121	122	137	139	146	253	261	298	295	281	281	403	403	449	446
SBZfVL3.28	Zymaflore® VL3	CR	115	121	122	137	139	146	253	261	298	295	293	281	385	385	449	449
SBZfVL3.29	Zymaflore® VL3	CR	115	121	122	137	146	146	253	261	298	320	293	281	403	385	449	446
SBZfVL3.2x	Zymaflore® VL3	CR	115	121	122	137	139	146	253	253	298	295	293	293	403	385	449	446
SBZfVL3.300	Zymaflore® VL3	CR	115	121	137	137	139	146	253	261	298	295	281	281	403	403	449	446
SBZfVL3.301	Zymaflore® VL3	CR	115	121	137	137	139	146	253	253	298	295	281	281	403	385	449	446
SBZfVL3.302	Zymaflore® VL3	CR	115	121	122	137	139	139	253	253	298	295	293	281	403	403	449	446
SBZfVL3.40	Zymaflore® VL3	CR	121	121	137	137	139	146	253	261	298	295	281	281	403	385	449	449
SBZfX5.20	Zymaflore® X5	CR	115	115	124	137	139	146	253	261	298	298	293	281	403	403	423	449
SBZfX5.30	Zymaflore® X5	CR	115	124	124	137	139	146	253	261	298	298	277	281	403	403	423	449
SBZfX5.31	Zymaflore® X5	CR	115	124	124	137	139	146	253	261	298	254	277	281	403	403	423	449
UvaSVG	Uvaferm SVG™	C	136	136	141	141	146	146	256	256	244	244	295	295	403	403	446	446
Vt3001	Vitilevure 3.001®	C	115	121	139	139	146	149	256	256	250	299	291	295	388	385	425	446
ZfFX10	Zymaflore® FX10	C	121	121	120	120	139	139	258	258	274	274	276	276	403	403	446	446
ZfVL2	Zymaflore® VL2	C	115	124	122	153	153	153	253	258	298	326	293	297	400	403	446	416
ZfVL3	Zymaflore® VL3	C	115	121	122	137	139	146	253	261	298	295	293	281	403	385	449	446

## Sheet: Readme
MLG name: Multi-locus genotype code.
Commercial strains matching genotypes are labelled by name,
Commercial related genotypes are labelled with "SB" followed by the commercial strain name,
Unique strains are labelled with "SBV" followed by a unique three-digit identifier
MLG class
C = Commercial. MLG is identical to commercial strain MLG.
CR = Commercial related. MLG is closely related to commercial strain (Bruvo dist <0.25)
U = Unique strain.
